# Supplementary material for: Biodegradable Zn–Li–Sr alloy implants with antioxidant properties for improved bone osseointegration under diabetic conditions
Source: Royal Society of Chemistry journal article supplement (doi:10.1039/d5tb00266d), 2025-01-01
Supplement: d5tb00266d1.pdf [file d5tb00266d1.pdf]

## Supplementary materials

**Table S1.** The grain size, and mechanical properties of pure Zn and Zn-Li-Sr alloy, n=3. Data are presented as mean  $\pm$  standard deviation.

| Materials | Grain size ( $\mu\text{m}$ ) | UTS (MPa)         | YS (MPa)          | Ductility (%)    | Vickers hardness (HV) |
|-----------|------------------------------|-------------------|-------------------|------------------|-----------------------|
| Pure Zn   | 14.38 $\pm$ 5.81             | 68.05 $\pm$ 5.58  | 48.38 $\pm$ 6.77  | 43.9 $\pm$ 1.49  | 31.90 $\pm$ 0.50      |
| Zn-Li-Sr  | 8.66 $\pm$ 4.20              | 452.15 $\pm$ 8.25 | 387.26 $\pm$ 5.55 | 18.23 $\pm$ 2.11 | 131.50 $\pm$ 6.30     |

**Table S2.** The mechanical properties, and weight loss (g) after 30 days of immersion of pure Zn and Zn-Li-Sr alloy, n=3. Data are presented as mean  $\pm$  standard deviation.

| Materials | UTS (MPa)         | YS (MPa)          | Ductility (%)    | Weight loss (%) |
|-----------|-------------------|-------------------|------------------|-----------------|
| Pure Zn   | 68.05 $\pm$ 5.58  | 48.38 $\pm$ 6.77  | 43.9 $\pm$ 1.49  | 0.8 $\pm$ 0.08% |
| Zn-Li-Sr  | 452.15 $\pm$ 8.25 | 387.26 $\pm$ 5.55 | 18.23 $\pm$ 2.11 | 0.5 $\pm$ 0.04% |

**Table S3.** Comparison of the properties of Zn-0.8Li, Zn-0.8Sr and Zn-0.8Li-0.8Sr alloys.

| Performance           | Zn-0.8Li <sup>1</sup>                                                | Zn-0.8Sr <sup>2</sup>                                                                                                                              | Zn-0.8Li-0.8Sr                                                                                                                                        |
|-----------------------|----------------------------------------------------------------------|----------------------------------------------------------------------------------------------------------------------------------------------------|-------------------------------------------------------------------------------------------------------------------------------------------------------|
| Mechanical properties | UTS: —<br>Microhardness: 200-240 HV                                  | UTS: 150-200 MPa<br>Microhardness: 45-50 HV                                                                                                        | UTS : 452.15 $\pm$ 8.25 MPa<br>Microhardness: 131.50 $\pm$ 6.30 HV                                                                                    |
| Corrosion pattern     | Small and uniform corrosion pits                                     | Large corrosion pits                                                                                                                               | Small corrosion pits                                                                                                                                  |
| Biocompatibility      | In vitro: promote the proliferation of MC3T3-E1 cells.<br>In vivo: — | In vitro: promote the proliferation and osteogenic differentiation of MC3T3-E1 cells.<br>In vivo: promoting the repair of femoral defects in rats. | In vitro: promote the proliferation and osteogenic differentiation of MC3T3-E1 cells.<br>In vivo: promoting the repair of femoral defects in diabetic |

**Table S4.** Primer sequence of MC3T3-E1 cells.

| Target gene | Direction | Primer sequence (5'-3') |
|-------------|-----------|-------------------------|
| ALP         | Forward   | GGAGATGGTATGGGCGTCTC    |
|             | Reverse   | GGACCTGAGCGTTGGTGTTA    |
| Col I       | Forward   | TTCTCCTGGCAAAGACGGAC    |
|             | Reverse   | CTCAAGGTCACGGTCACGAA    |
| OCN         | Forward   | CTGACCTCACAGATCCCAAGC   |
|             | Reverse   | TGGTCTGATAGCTCGTCACAAG  |
| RUNX-2      | Forward   | TCGGAGAGGTACCAGATGGG    |
|             | Reverse   | AGGTGAAACTCTTGCCTCGT    |

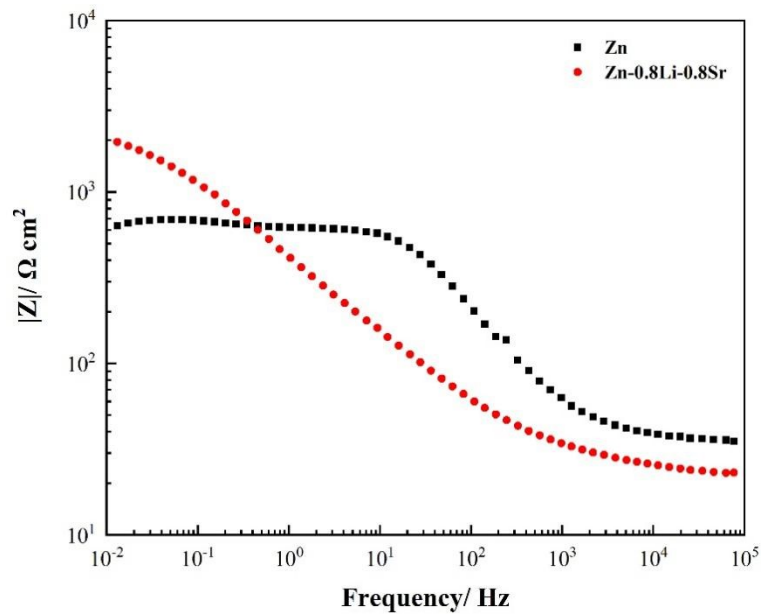**Fig S1.** Bode plots of pure Zn and Zn-Li-Sr alloy (n = 3).

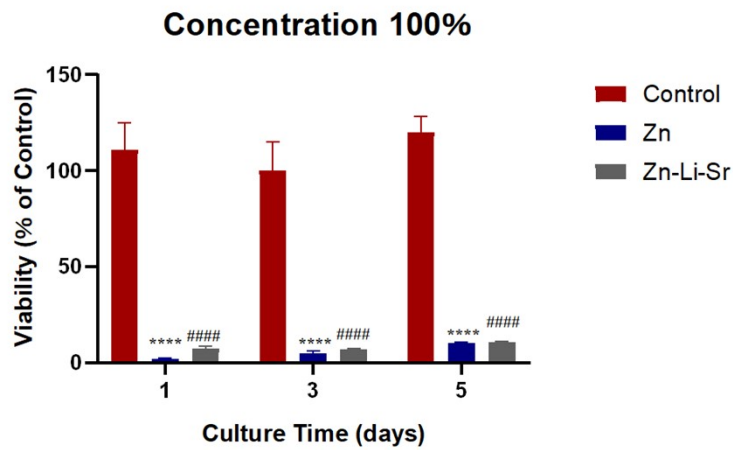

**Fig S2.** CCK8 results of 100%. Compared to the control group, statistical significance was set at: \*\*\*\* $P < 0.0001$ , #### $P < 0.0001$ . Data are presented as mean  $\pm$  SD (n = 3).

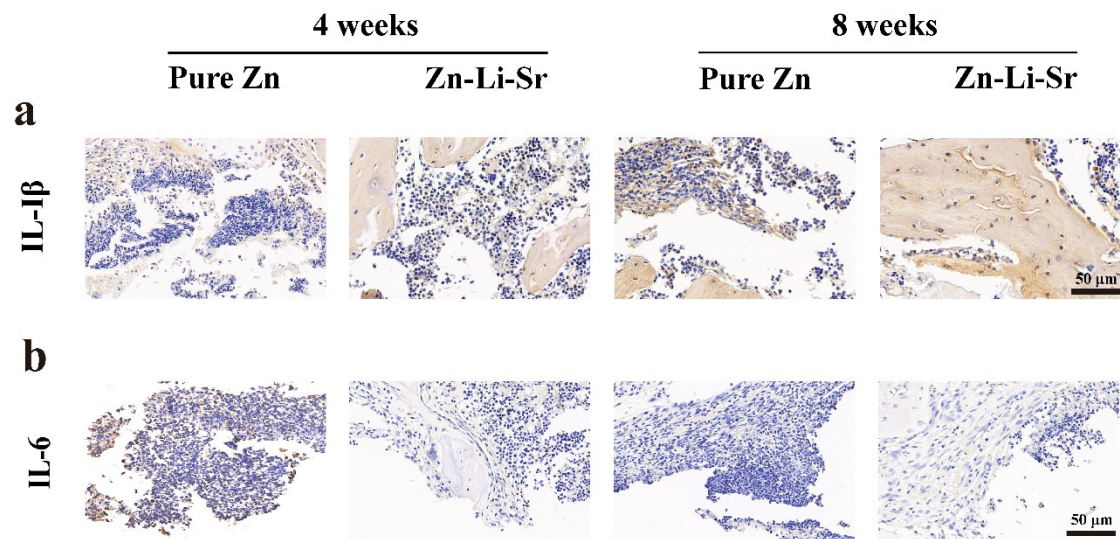

**Fig S3.** Immunohistochemical staining for inflammation. (a) Immunohistochemical staining of IL-1 $\beta$ . (b) Immunohistochemical staining of IL-6 (n = 3).

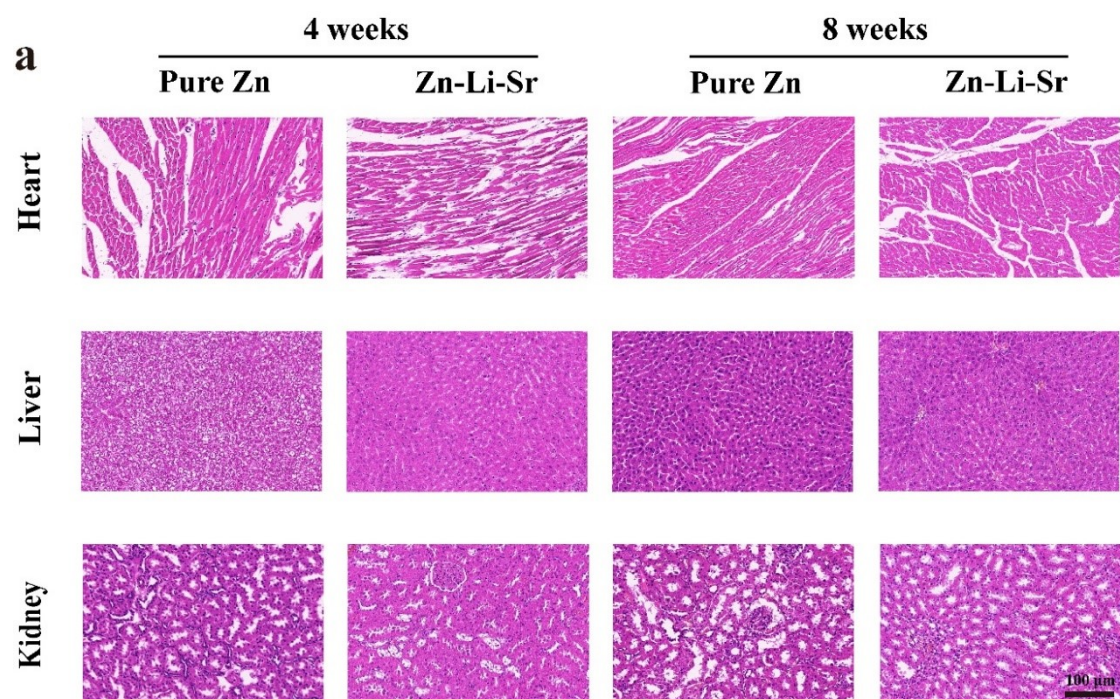

**Fig S4.** In vivo biosafety testing. (a) HE staining of heart, liver, and kidney (n = 3).

## Reference

1. H. Yang, B. Jia, Z. Zhang, X. Qu, G. Li, W. Lin, D. Zhu, K. Dai and Y. Zheng, *Nat Commun*, 2020, **11**, 401.
2. B. Jia, H. Yang, Z. Zhang, X. Qu, X. Jia, Q. Wu, Y. Han, Y. Zheng and K. Dai, *Bioact Mater*, 2021, **6**, 1588-1604.
